# Supplementary material for: Activation of thousands of genes in the lungs and kidneys by sepsis is countered by the selective nuclear blockade
Source: PubMed Central journal article supplement (PMC10450963; doi:10.3389/fimmu.2023.1221102), 2023-08-11
Supplement: DataSheet_2.pdf [file DataSheet_2.pdf]

Supplemental Tables.

**Genomic response to sepsis in the lungs and kidneys as illustrated by the heat map of the top 100 genes displaying the greatest gene expression fold change. ST1 A & B.** Genes with increased and decreased expression in both organs (Shared Genes) sorted by the fold expression in the lungs. **ST2 A & B.** Top genes expressed in the lungs. **ST3 A & B.** Top genes expressed in the kidneys. The data in both conditions CM (CM + Saline) and NTCl (CM + cSN50.1) is presented as a fold expression compared to Sham + Saline.

## Suppl. Tab. ST1A. Genes with Increased Expression in Sepsis Shared by Lungs and Kidneys

|    | Gene ID              | Gene Name                                                                                          | Lungs  |       | Kidneys |       |
|----|----------------------|----------------------------------------------------------------------------------------------------|--------|-------|---------|-------|
|    |                      |                                                                                                    | Saline | NTCI  | Saline  | NTCI  |
| 1  | <i>Csf3</i>          | colony stimulating factor 3 (granulocyte)                                                          | 1,347  | 1,296 | 847     | 1,168 |
| 2  | <i>Il10</i>          | interleukin 10                                                                                     | 460    | 25    | 6.3     | 6.6   |
| 3  | <i>Acod1</i>         | aconitate decarboxylase 1                                                                          | 452    | 103   | 73      | 53    |
| 4  | <i>Saa3</i>          | serum amyloid A 3                                                                                  | 412    | 106   | 23      | 12    |
| 5  | <i>Cxcl2</i>         | chemokine (C-X-C motif) ligand 2                                                                   | 323    | 215   | 217     | 555   |
| 6  | <i>Gpr31b</i>        | G protein-coupled receptor 31, D17Leh66b region                                                    | 306    | 67    | 5.4     | 4.8   |
| 7  | <i>Fgf23</i>         | fibroblast growth factor 23                                                                        | 227    | 437   | 28      | 27    |
| 8  | <i>Igfbp1</i>        | insulin-like growth factor binding protein 1                                                       | 111    | 80    | 4.6     | 8.0   |
| 9  | <i>Mt2</i>           | metallothionein 2                                                                                  | 106    | 123   | 14      | 39    |
| 10 | <i>Mrgpra2b</i>      | MAS-related GPR, member A2B                                                                        | 103    | 78    | 29      | 71    |
| 11 | <i>Ccl3</i>          | chemokine (C-C motif) ligand 3                                                                     | 101    | 8.9   | 12      | 4.5   |
| 12 | <i>Ccl4</i>          | chemokine (C-C motif) ligand 4                                                                     | 98     | 2.9   | 12      | 3.0   |
| 13 | <i>Gpr84</i>         | G protein-coupled receptor 84                                                                      | 81     | 19    | 20      | 17    |
| 14 | <i>Adams4</i>        | a disintegrin-like and metallopeptidase (repolysin type) with thrombospondin type 1 motif, 4       | 78     | 86    | 27      | 16    |
| 15 | <i>Madcam1</i>       | mucosal vascular addressin cell adhesion molecule 1                                                | 76     | 46    | 47      | 20    |
| 16 | <i>Il1r2</i>         | interleukin 1 receptor, type II                                                                    | 73     | 145   | 7.8     | 32    |
| 17 | <i>Olfm4</i>         | olfactomedin 4                                                                                     | 71     | 31    | 2.1     | 1.8   |
| 18 | <i>Il1f9</i>         | interleukin 36G                                                                                    | 68     | 8.6   | 34      | 16    |
| 19 | <i>Cxcl1</i>         | chemokine (C-X-C motif) ligand 1                                                                   | 64     | 61    | 123     | 262   |
| 20 | <i>Gpr31a</i>        | G protein-coupled receptor 31, D17Leh66a region                                                    | 62     | 16    | 12      | 3.8   |
| 21 | <i>Gpr31c</i>        | G protein-coupled receptor 31, D17Leh66c region                                                    | 60     | 17    | 3.1     | 2.3   |
| 22 | <i>Ptx3</i>          | pentraxin related gene                                                                             | 57     | 47    | 137     | 227   |
| 23 | <i>Slc7a11</i>       | solute carrier family 7 (cationic amino acid transporter, y+ system), member 11                    | 57     | 30    | 6.5     | 12    |
| 24 | <i>Gm6553</i>        | G protein-coupled receptor 31, D17Leh66c region pseudogene                                         | 55     | 17    | 14      | 9.8   |
| 25 | <i>Tmprss11g</i>     | transmembrane protease, serine 11g                                                                 | 54     | 103   | 18      | 39    |
| 26 | <i>Tac1</i>          | tachykinin 1                                                                                       | 54     | 80    | 27      | 86    |
| 27 | <i>Il1f6</i>         | interleukin 36A                                                                                    | 51     | 4.0   | 64      | 114   |
| 28 | <i>Ccl2</i>          | chemokine (C-C motif) ligand 2                                                                     | 50     | 16    | 16      | 17    |
| 29 | <i>Psg16</i>         | pregnancy specific beta-1-glycoprotein 16                                                          | 48     | 39    | 9.7     | 6.0   |
| 30 | <i>Fosl1</i>         | fos-like antigen 1                                                                                 | 48     | 31    | 11      | 24    |
| 31 | <i>Sprr2a2</i>       | small proline-rich protein 2A2                                                                     | 45     | 51    | 2.3     | 6.8   |
| 32 | <i>Serpina3m</i>     | serine (or cysteine) peptidase inhibitor, clade A, member 3M                                       | 45     | 29    | 17      | 7.4   |
| 33 | <i>Il1rn</i>         | interleukin 1 receptor antagonist                                                                  | 43     | 14    | 165     | 117   |
| 34 | <i>Cxcl3</i>         | chemokine (C-X-C motif) ligand 3                                                                   | 42     | 103   | 207     | 421   |
| 35 | <i>Ccl20</i>         | chemokine (C-C motif) ligand 20                                                                    | 41     | 41    | 8.1     | 8.1   |
| 36 | <i>Tnf</i>           | tumor necrosis factor                                                                              | 38     | 3.7   | 8.7     | 6.0   |
| 37 | <i>Gm43181</i>       | predicted gene 43181                                                                               | 37     | 13    | 23      | 15    |
| 38 | <i>Clec4e</i>        | C-type lectin domain family 4, member e                                                            | 37     | 18    | 45      | 83    |
| 39 | <i>Gm45774</i>       | predicted gene 45774                                                                               | 35     | 22    | 7.3     | 3.8   |
| 40 | <i>Ugt1a10</i>       | UDP glycosyltransferase 1 family, polypeptide A10                                                  | 35     | 39    | 3.5     | 1.9   |
| 41 | <i>Kcnt1</i>         | potassium channel, subfamily T, member 1                                                           | 32     | 28    | 2.4     | 2.1   |
| 42 | <i>Mt1</i>           | metallothionein 1                                                                                  | 31     | 39    | 5.9     | 19    |
| 43 | <i>Mefv</i>          | Mediterranean fever                                                                                | 31     | 20    | 17      | 18    |
| 44 | <i>Clec4d</i>        | C-type lectin domain family 4, member d                                                            | 31     | 16    | 12      | 13    |
| 45 | <i>Ms4a4a</i>        | membrane-spanning 4-domains, subfamily A, member 4A                                                | 31     | 12    | 12      | 7.1   |
| 46 | <i>Btbd16</i>        | BTB (POZ) domain containing 16                                                                     | 30     | 10    | 32      | 18    |
| 47 | <i>Spic</i>          | Spi-C transcription factor (Spi-1/PU.1 related)                                                    | 29     | 13    | 3.1     | 4.0   |
| 48 | <i>Orm1</i>          | orosomuroid 1                                                                                      | 29     | 10    | 7.8     | 2.6   |
| 49 | <i>Serpina3f</i>     | serine (or cysteine) peptidase inhibitor, clade A, member 3F                                       | 28     | 15    | 76      | 86    |
| 50 | <i>Il1b</i>          | interleukin 1 beta                                                                                 | 27     | 16    | 4.7     | 4.7   |
| 51 | <i>Serpina10</i>     | serine (or cysteine) peptidase inhibitor, clade A (alpha-1 antiproteinase, antitrypsin), member 10 | 27     | 9.3   | 6.4     | 2.1   |
| 52 | <i>9830107B12Rik</i> | RIKEN cDNA 9830107B12 gene                                                                         | 27     | 9.3   | 22      | 4.5   |
| 53 | <i>Gm49839</i>       | predicted gene, 49839                                                                              | 27     | 43    | 10.0    | 16    |
| 54 | <i>Msr1</i>          | macrophage scavenger receptor 1                                                                    | 27     | 7.2   | 6.0     | 5.5   |
| 55 | <i>Ankrd2</i>        | ankyrin repeat domain 2 (stretch responsive muscle)                                                | 26     | 14    | 13      | 15    |
| 56 | <i>Saa4</i>          | serum amyloid A 4                                                                                  | 25     | 5.5   | 14      | 0.8   |
| 57 | <i>S100a8</i>        | S100 calcium binding protein A8 (calgranulin A)                                                    | 25     | 14    | 15      | 21    |
| 58 | <i>Hpx</i>           | hemopexin                                                                                          | 24     | 6.6   | 25      | 1.3   |
| 59 | <i>Apoa4</i>         | apolipoprotein A-IV                                                                                | 24     | 2.2   | 1.8     | 2.2   |
| 60 | <i>Steap4</i>        | STEAP family member 4                                                                              | 23     | 15    | 39      | 17    |
| 61 | <i>Cxcl10</i>        | chemokine (C-X-C motif) ligand 10                                                                  | 22     | 12    | 9.3     | 7.5   |
| 62 | <i>S100a9</i>        | S100 calcium binding protein A9 (calgranulin B)                                                    | 22     | 15    | 14      | 21    |
| 63 | <i>Wfdc17</i>        | WAP four-disulfide core domain 17                                                                  | 22     | 5.1   | 3.5     | 3.2   |
| 64 | <i>Mmp8</i>          | matrix metallopeptidase 8                                                                          | 22     | 19    | 233     | 282   |
| 65 | <i>Gnat1</i>         | G protein subunit alpha transducin 1                                                               | 22     | 17    | 5.7     | 19    |

|     |                      |                                                                |    |     |     |     |
|-----|----------------------|----------------------------------------------------------------|----|-----|-----|-----|
| 66  | <i>Fgg</i>           | fibrinogen gamma chain                                         | 21 | 7.3 | 36  | 19  |
| 67  | <i>Fgb</i>           | fibrinogen beta chain                                          | 20 | 6.2 | 26  | 2.3 |
| 68  | <i>Lilr4b</i>        | leukocyte immunoglobulin-like receptor, subfamily B, member 4B | 20 | 13  | 3.8 | 6.2 |
| 69  | <i>2010003K11Rik</i> | RIKEN cDNA 2010003K11 gene                                     | 20 | 5.8 | 5.8 | 9.5 |
| 70  | <i>Serpina3n</i>     | serine (or cysteine) peptidase inhibitor, clade A, member 3N   | 20 | 11  | 29  | 9.3 |
| 71  | <i>AA467197</i>      | expressed sequence AA467197                                    | 19 | 14  | 39  | 40  |
| 72  | <i>Gm16685</i>       | predicted gene, 16685                                          | 19 | 19  | 4.1 | 3.2 |
| 73  | <i>Timp1</i>         | tissue inhibitor of metalloproteinase 1                        | 19 | 14  | 6.7 | 5.6 |
| 74  | <i>Fga</i>           | fibrinogen alpha chain                                         | 18 | 5.5 | 37  | 24  |
| 75  | <i>Ifitm6</i>        | interferon induced transmembrane protein 6                     | 18 | 19  | 7.0 | 14  |
| 76  | <i>Lcn2</i>          | lipocalin 2                                                    | 18 | 9.5 | 53  | 53  |
| 77  | <i>F10</i>           | coagulation factor X                                           | 18 | 3.3 | 4.9 | 1.2 |
| 78  | <i>Leap2</i>         | liver-expressed antimicrobial peptide 2                        | 17 | 4.3 | 6.4 | 0.5 |
| 79  | <i>Il6</i>           | interleukin 6                                                  | 17 | 56  | 223 | 671 |
| 80  | <i>Retnlg</i>        | resistin like gamma                                            | 16 | 16  | 9.1 | 22  |
| 81  | <i>Ccl7</i>          | chemokine (C-C motif) ligand 7                                 | 16 | 6.6 | 13  | 19  |
| 82  | <i>Ikbke</i>         | inhibitor of kappaB kinase epsilon                             | 15 | 3.9 | 2.9 | 1.4 |
| 83  | <i>Vcan</i>          | versican                                                       | 14 | 8.1 | 6.8 | 9.0 |
| 84  | <i>F13a1</i>         | coagulation factor XIII, A1 subunit                            | 14 | 5.9 | 2.5 | 1.8 |
| 85  | <i>Serpina3g</i>     | serine (or cysteine) peptidase inhibitor, clade A, member 3G   | 14 | 9.3 | 14  | 11  |
| 86  | <i>1200007C13Rik</i> | RIKEN cDNA 1200007C13 gene                                     | 14 | 19  | 35  | 73  |
| 87  | <i>Ngp</i>           | neutrophilic granule protein                                   | 13 | 13  | 481 | 612 |
| 88  | <i>Siglece</i>       | sialic acid binding Ig-like lectin E                           | 13 | 5.2 | 3.1 | 2.1 |
| 89  | <i>Lrrc25</i>        | leucine rich repeat containing 25                              | 13 | 5.8 | 3.1 | 2.7 |
| 90  | <i>Gm10309</i>       | predicted gene 10309                                           | 13 | 8.4 | 36  | 20  |
| 91  | <i>Trem1</i>         | triggering receptor expressed on myeloid cells 1               | 13 | 9.3 | 9.0 | 15  |
| 92  | <i>Slc39a14</i>      | solute carrier family 39 (zinc transporter), member 14         | 13 | 8.4 | 4.6 | 4.3 |
| 93  | <i>Fgl1</i>          | fibrinogen-like protein 1                                      | 13 | 4.3 | 3.5 | 1.0 |
| 94  | <i>Il27</i>          | interleukin 27                                                 | 12 | 2.5 | 8.5 | 6.0 |
| 95  | <i>Tcp10b</i>        | t-complex protein 10b                                          | 12 | 13  | 4.7 | 2.7 |
| 96  | <i>Serpina3i</i>     | serine (or cysteine) peptidase inhibitor, clade A, member 3I   | 12 | 11  | 26  | 68  |
| 97  | <i>Cxcl9</i>         | chemokine (C-X-C motif) ligand 9                               | 12 | 3.7 | 16  | 16  |
| 98  | <i>A730049H05Rik</i> | RIKEN cDNA A730049H05 gene                                     | 12 | 30  | 2.4 | 2.3 |
| 99  | <i>Gm8883</i>        | predicted gene 8883                                            | 12 | 0.7 | 3.7 | 1.7 |
| 100 | <i>Fpr2</i>          | formyl peptide receptor 2                                      | 12 | 8.5 | 25  | 31  |

Suppl. Tab. ST1B. Genes with Decreased Expression in Sepsis Shared by Lungs and Kidneys

|    | Gene ID              | Gene Name                                                                                                     | Lungs  |      | Kidneys |      |
|----|----------------------|---------------------------------------------------------------------------------------------------------------|--------|------|---------|------|
|    |                      |                                                                                                               | Saline | NTCI | Saline  | NTCI |
| 1  | <i>Ano5</i>          | anoctamin 5                                                                                                   | -53    | -9.3 | -17     | -11  |
| 2  | <i>Gsg1l</i>         | GSG1-like                                                                                                     | -31    | -6.9 | -72     | -126 |
| 3  | <i>Spon2</i>         | spondin 2, extracellular matrix protein                                                                       | -27    | -13  | -16     | -2.9 |
| 4  | <i>Oxtr</i>          | oxytocin receptor                                                                                             | -26    | -1.0 | -22     | -14  |
| 5  | <i>Rnf112</i>        | ring finger protein 112                                                                                       | -21    | -12  | -39     | NS   |
| 6  | <i>Ppp2r2c</i>       | protein phosphatase 2, regulatory subunit B, gamma                                                            | -17    | -5.1 | -4.3    | -33  |
| 7  | <i>Crabp1</i>        | cellular retinoic acid binding protein I                                                                      | -16    | -7.5 | -30     | -4.8 |
| 8  | <i>St6galnac3</i>    | ST6 (alpha-N-acetyl-neuraminyl-2,3-beta-galactosyl-1,3)-N-acetylgalactosaminide alpha 2,6-sialyltransferase 3 | -15    | -6.7 | -4.1    | -3.1 |
| 9  | <i>Agtr2</i>         | angiotensin II receptor, type 2                                                                               | -12    | -1.5 | -23     | -39  |
| 10 | <i>Gjc2</i>          | gap junction protein, gamma 2                                                                                 | -11    | -9.4 | -23     | -28  |
| 11 | <i>Gm33195</i>       | predicted gene, 33195                                                                                         | -11    | -1.3 | -5.8    | -2.0 |
| 12 | <i>Gabra4</i>        | gamma-aminobutyric acid (GABA) A receptor, subunit alpha 4                                                    | -10    | -5.0 | -3.8    | -5.1 |
| 13 | <i>Aplnr</i>         | apelin receptor                                                                                               | -10    | -4.0 | -3.2    | -5.7 |
| 14 | <i>E03001319Rik</i>  | RIKEN cDNA E03001319 gene                                                                                     | -9.2   | -6.9 | -6.1    | -3.0 |
| 15 | <i>Pcdh12</i>        | protocadherin 12                                                                                              | -8.9   | -10  | -3.2    | -4.1 |
| 16 | <i>Chp2</i>          | calcineurin-like EF hand protein 2                                                                            | -8.6   | -5.5 | -4.2    | -2.7 |
| 17 | <i>Gng8</i>          | guanine nucleotide binding protein (G protein), gamma 8                                                       | -8.6   | -4.5 | -20     | -48  |
| 18 | <i>Pla2g2d</i>       | phospholipase A2, group IID                                                                                   | -8.1   | -3.0 | -4.7    | -3.5 |
| 19 | <i>Gm20683</i>       | predicted gene 20683                                                                                          | -7.9   | -1.5 | -2.0    | -1.2 |
| 20 | <i>Mansc4</i>        | MANSC domain containing 4                                                                                     | -7.7   | -4.4 | -2.7    | -1.8 |
| 21 | <i>Gm10824</i>       | predicted gene 10824                                                                                          | -7.5   | -4.6 | -5.3    | -5.1 |
| 22 | <i>Ces2b</i>         | carboxyesterase 2B                                                                                            | -7.5   | -4.6 | -2.5    | -1.4 |
| 23 | <i>Kank4</i>         | KN motif and ankyrin repeat domains 4                                                                         | -7.4   | -12  | -2.7    | -4.2 |
| 24 | <i>Zmat4</i>         | zinc finger, matrin type 4                                                                                    | -7.4   | -9.5 | -3.9    | -2.1 |
| 25 | <i>Cdr1os</i>        | cerebellar degeneration related antigen 1, opposite strand                                                    | -7.2   | -3.5 | -43     | NS   |
| 26 | <i>Wnt2</i>          | wingless-type MMTV integration site family, member 2                                                          | -7.1   | -6.0 | -4.0    | -2.5 |
| 27 | <i>Gm17040</i>       | predicted gene 17040                                                                                          | -6.7   | -1.4 | -2.9    | -1.7 |
| 28 | <i>Wfdc16</i>        | WAP four-disulfide core domain 16                                                                             | -6.7   | -4.7 | -2.2    | -1.0 |
| 29 | <i>Rab42</i>         | RAB42, member RAS oncogene family                                                                             | -6.7   | -5.6 | -5.0    | -7.9 |
| 30 | <i>Tbxa2r</i>        | thromboxane A2 receptor                                                                                       | -6.7   | -8.8 | -4.4    | -9.7 |
| 31 | <i>Plppr5</i>        | phospholipid phosphatase related 5                                                                            | -6.6   | -2.4 | -47     | -6.2 |
| 32 | <i>Misp3</i>         | MISP family member 3                                                                                          | -6.3   | -11  | -2.6    | -1.7 |
| 33 | <i>Mmp28</i>         | matrix metalloproteinase 28 (epilysin)                                                                        | -6.3   | -6.4 | -1.8    | -3.2 |
| 34 | <i>Lrrm4</i>         | leucine rich repeat neuronal 4                                                                                | -6.2   | -3.6 | -11     | -6.1 |
| 35 | <i>Sost</i>          | sclerostin                                                                                                    | -6.1   | -8.5 | -107    | -17  |
| 36 | <i>Tmem200a</i>      | transmembrane protein 200A                                                                                    | -6.1   | -4.8 | -10     | -5.6 |
| 37 | <i>Shisa2</i>        | shisa family member 2                                                                                         | -6.1   | -11  | -1.9    | -2.6 |
| 38 | <i>Stmn2</i>         | stathmin-like 2                                                                                               | -5.9   | -2.4 | -3.8    | -2.5 |
| 39 | <i>Chrm1</i>         | cholinergic receptor, muscarinic 1, CNS                                                                       | -5.9   | -3.0 | -6.6    | -25  |
| 40 | <i>Tmeff2</i>        | transmembrane protein with EGF-like and two follistatin-like domains 2                                        | -5.9   | -2.8 | -7.7    | -4.9 |
| 41 | <i>2810433D01Rik</i> | RIKEN cDNA 2810433D01 gene                                                                                    | -5.8   | -7.0 | -3.6    | -2.6 |
| 42 | <i>Pabpc4l</i>       | poly(A) binding protein, cytoplasmic 4-like                                                                   | -5.8   | -5.9 | -6.4    | -18  |
| 43 | <i>Dact3</i>         | dishevelled-binding antagonist of beta-catenin 3                                                              | -5.7   | -6.0 | -4.9    | -7.4 |
| 44 | <i>Mettl24</i>       | methyltransferase like 24                                                                                     | -5.7   | -2.7 | -3.2    | -1.5 |
| 45 | <i>Gpr34</i>         | G protein-coupled receptor 34                                                                                 | -5.7   | -4.7 | -14     | -8.3 |
| 46 | <i>D430019H16Rik</i> | RIKEN cDNA D430019H16 gene                                                                                    | -5.6   | -8.9 | -6.6    | -13  |
| 47 | <i>Hoxc5</i>         | homeobox C5                                                                                                   | -5.5   | -13  | -2.1    | -3.7 |
| 48 | <i>Tekt5</i>         | tektin 5                                                                                                      | -5.4   | -2.2 | -5.9    | -6.1 |
| 49 | <i>Megf10</i>        | multiple EGF-like-domains 10                                                                                  | -5.4   | -2.5 | -34     | -22  |
| 50 | <i>Wscd1</i>         | WSC domain containing 1                                                                                       | -5.4   | -4.2 | -2.5    | -4.1 |
| 51 | <i>Gm32219</i>       | predicted gene, 32219                                                                                         | -5.4   | -2.8 | -51     | -33  |
| 52 | <i>Tril</i>          | TLR4 interactor with leucine-rich repeats                                                                     | -5.3   | -5.2 | -3.5    | -5.3 |
| 53 | <i>Agtr1b</i>        | angiotensin II receptor, type 1b                                                                              | -5.3   | -2.6 | -17     | -41  |
| 54 | <i>2610203C22Rik</i> | RIKEN cDNA 2610203C22 gene                                                                                    | -5.2   | -6.0 | -4.1    | -4.5 |
| 55 | <i>Abcg3</i>         | ATP binding cassette subfamily G member 3                                                                     | -5.2   | -6.9 | -13     | -9.5 |
| 56 | <i>Star</i>          | steroidogenic acute regulatory protein                                                                        | -5.2   | -1.4 | -914    | -588 |
| 57 | <i>Grik2</i>         | glutamate receptor, ionotropic, kainate 2 (beta 2)                                                            | -5.1   | -2.1 | -39     | -6.1 |
| 58 | <i>Grin2c</i>        | glutamate receptor, ionotropic, NMDA2C (epsilon 3)                                                            | -5.1   | -1.7 | -5.3    | -2.8 |
| 59 | <i>Vstm5</i>         | V-set and transmembrane domain containing 5                                                                   | -5.1   | -3.8 | -2.7    | -2.2 |
| 60 | <i>Smad9</i>         | SMAD family member 9                                                                                          | -5.1   | -6.1 | -4.4    | -6.3 |
| 61 | <i>Pianp</i>         | PILR alpha associated neural protein                                                                          | -4.9   | -3.7 | -12     | -5.4 |
| 62 | <i>Rnf144a</i>       | ring finger protein 144A                                                                                      | -4.9   | -5.3 | -1.7    | -1.6 |
| 63 | <i>Cthrc1</i>        | collagen triple helix repeat containing 1                                                                     | -4.8   | -5.7 | -16     | -3.4 |
| 64 | <i>Nxpe4</i>         | neurexophilin and PC-esterase domain family, member 4                                                         | -4.8   | -3.9 | -1.8    | -2.0 |
| 65 | <i>Mrc2</i>          | mannose receptor, C type 2                                                                                    | -4.8   | -2.8 | -2.3    | -2.1 |
| 66 | <i>Cx3cr1</i>        | chemokine (C-X3-C motif) receptor 1                                                                           | -4.8   | -8.8 | -4.8    | -13  |

|     |                      |                                                                     |      |      |      |       |
|-----|----------------------|---------------------------------------------------------------------|------|------|------|-------|
| 67  | <i>Il5ra</i>         | interleukin 5 receptor, alpha                                       | -4.8 | -2.8 | -4.2 | -8.0  |
| 68  | <i>Kcnc4</i>         | potassium voltage gated channel, Shaw-related subfamily, member 4   | -4.7 | -1.9 | -5.4 | -2.9  |
| 69  | <i>Fam163a</i>       | family with sequence similarity 163, member A                       | -4.7 | -18  | -2.1 | -1.8  |
| 70  | <i>Cxcr3</i>         | chemokine (C-X-C motif) receptor 3                                  | -4.6 | -3.2 | -3.3 | -3.7  |
| 71  | <i>A330074K22Rik</i> | RIKEN cDNA A330074K22 gene                                          | -4.6 | -12  | -75  | -25   |
| 72  | <i>Gm11627</i>       | predicted gene 11627                                                | -4.6 | -3.2 | -13  | -7.3  |
| 73  | <i>Mmp11</i>         | matrix metalloproteinase 11                                         | -4.6 | -5.9 | -1.9 | -1.2  |
| 74  | <i>Fam181b</i>       | family with sequence similarity 181, member B                       | -4.6 | -4.9 | -3.3 | -5.3  |
| 75  | <i>Cd209b</i>        | CD209b antigen                                                      | -4.5 | -2.2 | -53  | -4.9  |
| 76  | <i>Tnfrsf19</i>      | tumor necrosis factor receptor superfamily, member 19               | -4.5 | -3.6 | -27  | -19   |
| 77  | <i>Sept4</i>         | septin 4                                                            | -4.5 | -3.4 | -3.7 | -2.7  |
| 78  | <i>Nlgn3</i>         | neuroligin 3                                                        | -4.4 | -3.0 | -173 | -426  |
| 79  | <i>Baalc</i>         | brain and acute leukemia, cytoplasmic                               | -4.4 | -2.0 | -8.9 | -4.5  |
| 80  | <i>Ngb</i>           | neuroglobin                                                         | -4.4 | -3.7 | -10  | -4.0  |
| 81  | <i>Nxph3</i>         | neurexophilin 3                                                     | -4.4 | -3.6 | -8.6 | -2.1  |
| 82  | <i>Klb</i>           | klotho beta                                                         | -4.3 | -2.5 | -5.1 | -2.7  |
| 83  | <i>Igkv4-72</i>      | immunoglobulin kappa chain variable 4-72                            | -4.3 | -7.2 | -31  | -20   |
| 84  | <i>Ptprv</i>         | protein tyrosine phosphatase receptor type V                        | -4.3 | -2.6 | -30  | -2.3  |
| 85  | <i>Nrep</i>          | neuronal regeneration related protein                               | -4.2 | -1.7 | -2.6 | -9.4  |
| 86  | <i>Itga8</i>         | integrin alpha 8                                                    | -4.2 | -1.8 | -2.9 | -1.4  |
| 87  | <i>Myct1</i>         | myc target 1                                                        | -4.2 | -8.1 | -4.9 | -10.0 |
| 88  | <i>Palm</i>          | paralemmin                                                          | -4.2 | -4.3 | -2.2 | -2.2  |
| 89  | <i>Syt3</i>          | synaptotagmin III                                                   | -4.2 | -1.9 | -1.9 | -1.1  |
| 90  | <i>Tspan18</i>       | tetraspanin 18                                                      | -4.2 | -1.8 | -2.3 | -3.0  |
| 91  | <i>Piezo2</i>        | piezo-type mechanosensitive ion channel component 2                 | -4.1 | -2.7 | -3.2 | -0.9  |
| 92  | <i>Nat8f3</i>        | N-acetyltransferase 8 (GCN5-related) family member 3                | -4.1 | -8.9 | -1.7 | -2.9  |
| 93  | <i>Cngb1</i>         | cyclic nucleotide gated channel beta 1                              | -4.1 | -1.2 | -8.8 | -1.7  |
| 94  | <i>Cd209g</i>        | CD209g antigen                                                      | -4.1 | -19  | -32  | -4.1  |
| 95  | <i>Faim2</i>         | Fas apoptotic inhibitory molecule 2                                 | -4.0 | -3.4 | -5.5 | -13   |
| 96  | <i>Gfra2</i>         | glial cell line derived neurotrophic factor family receptor alpha 2 | -4.0 | -3.2 | -4.7 | -4.1  |
| 97  | <i>Srpk3</i>         | serine/arginine-rich protein specific kinase 3                      | -4.0 | -3.1 | -74  | -3.3  |
| 98  | <i>Gm3716</i>        | predicted gene 3716                                                 | -4.0 | -4.2 | -7.1 | -6.2  |
| 99  | <i>Klhl13</i>        | kelch-like 13                                                       | -4.0 | -3.1 | -2.6 | -1.5  |
| 100 | <i>Mogat2</i>        | monoacylglycerol O-acyltransferase 2                                | -3.9 | -6.1 | -2.4 | -1.2  |

Suppl. Tab. ST2A. Genes with Increased Expression in Lungs of Infected Mice

|    | Gene ID              | Gene Name                                                                                         | Lungs  |       |
|----|----------------------|---------------------------------------------------------------------------------------------------|--------|-------|
|    |                      |                                                                                                   | Saline | NTCI  |
| 1  | <i>Saa2</i>          | serum amyloid A 2                                                                                 | 3,985  | 1,338 |
| 2  | <i>Saa1</i>          | serum amyloid A 1                                                                                 | 1,849  | 658   |
| 3  | <i>Prok2</i>         | prokineticin 2                                                                                    | 1,783  | 450   |
| 4  | <i>B230303A05Rik</i> | U1 small nuclear ribonucleoprotein 1C pseudogene                                                  | 1,612  | 697   |
| 5  | <i>Gm43079</i>       | predicted gene 43079                                                                              | 423    | 1.0   |
| 6  | <i>Gm49383</i>       | predicted gene, 49383                                                                             | 309    | 167   |
| 7  | <i>Cldn14</i>        | claudin 14                                                                                        | 270    | 119   |
| 8  | <i>Gm15056</i>       | predicted gene 15056                                                                              | 200    | 17    |
| 9  | <i>U90926</i>        | cDNA sequence U90926                                                                              | 190    | 9.9   |
| 10 | <i>Stfa2</i>         | stefin A2                                                                                         | 185    | 90    |
| 11 | <i>Prokr2</i>        | prokineticin receptor 2                                                                           | 171    | 4.5   |
| 12 | <i>Lbx1</i>          | ladybird homeobox 1                                                                               | 167    | 105   |
| 13 | <i>Cstdc5</i>        | cystatin domain containing 5                                                                      | 123    | 101   |
| 14 | <i>Tarm1</i>         | T cell-interacting, activating receptor on myeloid cells 1                                        | 119    | 41    |
| 15 | <i>Mrgpra2a</i>      | MAS-related GPR, member A2A                                                                       | 88     | 64    |
| 16 | <i>Cstdc4</i>        | cystatin domain containing 4                                                                      | 88     | 80    |
| 17 | <i>Gm48786</i>       | predicted gene, 48786                                                                             | 84     | 32    |
| 18 | <i>Gm19510</i>       | predicted gene, 19510                                                                             | 84     | 4.3   |
| 19 | <i>Gm32089</i>       | predicted gene, 32089                                                                             | 74     | 29    |
| 20 | <i>Gm5966</i>        | predicted gene 5966                                                                               | 67     | 30    |
| 21 | <i>Stfa3</i>         | stefin A3                                                                                         | 63     | 39    |
| 22 | <i>Tmem132e</i>      | transmembrane protein 132E                                                                        | 58     | 87    |
| 23 | <i>Orm2</i>          | orosomucoid 2                                                                                     | 56     | 12    |
| 24 | <i>Gm28551</i>       | predicted gene 28551                                                                              | 56     | 63    |
| 25 | <i>A630023A22Rik</i> | RIKEN cDNA A630023A22 gene                                                                        | 55     | 50    |
| 26 | <i>Gm7457</i>        | predicted gene 7457                                                                               | 54     | 43    |
| 27 | <i>Serpina7</i>      | serine (or cysteine) peptidase inhibitor, clade A (alpha-1 antiproteinase, antitrypsin), member 7 | 53     | 25    |
| 28 | <i>Bmerb1</i>        | bMERB domain containing 1                                                                         | 49     | 28    |
| 29 | <i>Klk9</i>          | kallikrein related-peptidase 9                                                                    | 48     | 29    |
| 30 | <i>1700011B04Rik</i> | RIKEN cDNA 1700011B04 gene                                                                        | 48     | 15    |
| 31 | <i>Asprv1</i>        | aspartic peptidase, retroviral-like 1                                                             | 48     | 12    |
| 32 | <i>Dmbt1</i>         | deleted in malignant brain tumors 1                                                               | 48     | 118   |
| 33 | <i>Tmprss11d</i>     | transmembrane protease, serine 11d                                                                | 47     | 7.4   |
| 34 | <i>Slc5a7</i>        | solute carrier family 5 (choline transporter), member 7                                           | 43     | 18    |
| 35 | <i>Ifitm7</i>        | interferon induced transmembrane protein 7                                                        | 42     | 17    |
| 36 | <i>Gm38340</i>       | predicted gene, 38340                                                                             | 41     | 26    |
| 37 | <i>Pglyrp3</i>       | peptidoglycan recognition protein 3                                                               | 41     | 22    |
| 38 | <i>Gm26748</i>       | predicted gene, 26748                                                                             | 40     | 13    |
| 39 | <i>4930431P03Rik</i> | RIKEN cDNA 4930431P03 gene                                                                        | 39     | 11    |
| 40 | <i>4732490B19Rik</i> | RIKEN cDNA 4732490B19 gene                                                                        | 38     | 134   |
| 41 | <i>Sectm1b</i>       | secreted and transmembrane 1B                                                                     | 37     | 38    |
| 42 | <i>Gm4948</i>        | trans-2,3-enoyl-CoA reductase pseudogene                                                          | 36     | 229   |
| 43 | <i>Gm20406</i>       | predicted gene, 20406                                                                             | 33     | 5.2   |
| 44 | <i>Rasl10b</i>       | RAS-like, family 10, member B                                                                     | 33     | 13    |
| 45 | <i>Gm36079</i>       | annexin A2 receptor 2                                                                             | 32     | 12    |
| 46 | <i>Sult2a3</i>       | sulfotransferase family 2A, dehydroepiandrosterone (DHEA)-preferring, member 3                    | 32     | 3.6   |
| 47 | <i>Apcs</i>          | amyloid P component, serum                                                                        | 32     | 11    |
| 48 | <i>Mymk</i>          | myomaker, myoblast fusion factor                                                                  | 31     | 11    |
| 49 | <i>Nkx2-9</i>        | NK2 homeobox 9                                                                                    | 29     | 3.8   |
| 50 | <i>Gm26535</i>       | predicted gene, 26535                                                                             | 29     | 7.5   |
| 51 | <i>Rnase2a</i>       | ribonuclease, RNase A family, 2A (liver, eosinophil-derived neurotoxin)                           | 29     | 5.9   |
| 52 | <i>Slc22a20</i>      | solute carrier family 22 (organic anion transporter), member 20                                   | 28     | 6.0   |
| 53 | <i>Stfa2l1</i>       | stefin A2 like 1                                                                                  | 28     | 24    |
| 54 | <i>Gm4949</i>        | glutamate-ammonia ligase (glutamine synthetase) pseudogene                                        | 28     | 81    |
| 55 | <i>Gm11738</i>       | predicted gene 11738                                                                              | 27     | 556   |
| 56 | <i>Gm29686</i>       | predicted gene, 29686                                                                             | 27     | 9.3   |
| 57 | <i>Serpine3</i>      | serpin peptidase inhibitor, clade E (nexin, plasminogen activator inhibitor type 1), member 3     | 27     | 9.9   |
| 58 | <i>Gm807</i>         | predicted gene 807                                                                                | 26     | 45    |
| 59 | <i>Gm26444</i>       | predicted gene, 26444                                                                             | 26     | 16    |
| 60 | <i>Trdv5</i>         | T cell receptor delta variable 5                                                                  | 25     | 4.3   |
| 61 | <i>Sult1e1</i>       | sulfotransferase family 1E, member 1                                                              | 25     | 8.6   |
| 62 | <i>Serpina3e-ps</i>  | serine (or cysteine) peptidase inhibitor, clade A, member 3E, pseudogene                          | 25     | 16    |
| 63 | <i>4930578G10Rik</i> | RIKEN cDNA 4930578G10 gene                                                                        | 24     | 22    |
| 64 | <i>Gm37645</i>       | predicted gene, 37645                                                                             | 24     | 3.6   |
| 65 | <i>Ceacam19</i>      | CEA cell adhesion molecule 19                                                                     | 23     | 3.2   |

|     |                      |                                                                                |    |      |
|-----|----------------------|--------------------------------------------------------------------------------|----|------|
| 66  | <i>Ackr1</i>         | atypical chemokine receptor 1 (Duffy blood group)                              | 23 | 12   |
| 67  | <i>Ms4a3</i>         | membrane-spanning 4-domains, subfamily A, member 3                             | 23 | 1.9  |
| 68  | <i>B130046B21Rik</i> | RIKEN cDNA B130046B21 gene                                                     | 23 | 30   |
| 69  | <i>Ctcflos</i>       | CCCTC-binding factor (zinc finger protein)-like, opposite strand               | 23 | 17   |
| 70  | <i>Doc2b</i>         | double C2, beta                                                                | 23 | 24   |
| 71  | <i>Gm49573</i>       | predicted gene, 49573                                                          | 22 | 1.0  |
| 72  | <i>Gm38275</i>       | predicted gene, 38275                                                          | 21 | 6.5  |
| 73  | <i>Tex44</i>         | testis expressed 44                                                            | 21 | 2.1  |
| 74  | <i>Gpr22</i>         | G protein-coupled receptor 22                                                  | 21 | 11   |
| 75  | <i>Ceacam10</i>      | CEA cell adhesion molecule 10                                                  | 21 | 16   |
| 76  | <i>E030018B13Rik</i> | RIKEN cDNA E030018B13 gene                                                     | 20 | 6.0  |
| 77  | <i>Gm37131</i>       | predicted gene, 37131                                                          | 20 | 14   |
| 78  | <i>Htr3a</i>         | 5-hydroxytryptamine (serotonin) receptor 3A                                    | 20 | 8.8  |
| 79  | <i>Slc13a5</i>       | solute carrier family 13 (sodium-dependent citrate transporter), member 5      | 20 | 6.6  |
| 80  | <i>Nxf3</i>          | nuclear RNA export factor 3                                                    | 19 | 6.6  |
| 81  | <i>Gm49427</i>       | predicted gene, 49427                                                          | 19 | 3.2  |
| 82  | <i>Pde6h</i>         | phosphodiesterase 6H, cGMP-specific, cone, gamma                               | 19 | 10   |
| 83  | <i>Ubd</i>           | ubiquitin D                                                                    | 19 | 5.5  |
| 84  | <i>Fcrlb</i>         | Fc receptor-like B                                                             | 19 | 7.5  |
| 85  | <i>Sult2a5</i>       | sulfotransferase family 2A, dehydroepiandrosterone (DHEA)-preferring, member 5 | 19 | 4.1  |
| 86  | <i>Tat</i>           | tyrosine aminotransferase                                                      | 18 | 11   |
| 87  | <i>Gm6610</i>        | predicted gene 6610                                                            | 18 | -1.9 |
| 88  | <i>Gm44292</i>       | predicted gene, 44292                                                          | 18 | 21   |
| 89  | <i>Gm44165</i>       | predicted gene, 44165                                                          | 17 | 12   |
| 90  | <i>Prss22</i>        | protease, serine 22                                                            | 17 | 41   |
| 91  | <i>Gm11714</i>       | predicted gene 11714                                                           | 16 | 32   |
| 92  | <i>Gm49368</i>       | predicted gene, 49368                                                          | 16 | 2.6  |
| 93  | <i>Gm48065</i>       | predicted gene, 48065                                                          | 16 | 23   |
| 94  | <i>Aoah</i>          | acyloxyacyl hydrolase                                                          | 16 | 5.5  |
| 95  | <i>Tctex1d1</i>      | dynein light chain Tctex-type 5                                                | 16 | 2.7  |
| 96  | <i>Phox2a</i>        | paired-like homeobox 2a                                                        | 16 | 19   |
| 97  | <i>Slc36a3</i>       | solute carrier family 36 (proton/amino acid symporter), member 3               | 15 | 5.7  |
| 98  | <i>Sult2a1</i>       | sulfotransferase family 2A, dehydroepiandrosterone (DHEA)-preferring, member 1 | 15 | 3.2  |
| 99  | <i>Gm37347</i>       | predicted gene, 37347                                                          | 15 | 6.9  |
| 100 | <i>Gm50083</i>       | predicted gene, 50083                                                          | 15 | 3.7  |

## Suppl. Tab. ST3B. Genes with Decreased Expression in Lungs of Infected Mice

|    | Gene ID              | Gene Name                                                          | Lungs  |      |
|----|----------------------|--------------------------------------------------------------------|--------|------|
|    |                      |                                                                    | Saline | NTCI |
| 1  | <i>Tmem233</i>       | transmembrane protein 233                                          | -77    | NS   |
| 2  | <i>Duxbl3</i>        | double homeobox B-like 1                                           | -71    | -2.2 |
| 3  | <i>Rnase1</i>        | ribonuclease, RNase A family, 1 (pancreatic)                       | -58    | NS   |
| 4  | <i>Defb42</i>        | defensin beta 42                                                   | -57    | NS   |
| 5  | <i>AL935121.1</i>    | predicted gene, 52968                                              | -54    | -2.2 |
| 6  | <i>Zp1</i>           | zona pellucida glycoprotein 1                                      | -53    | -14  |
| 7  | <i>Snurf</i>         | SNRPN upstream reading frame                                       | -47    | NS   |
| 8  | <i>Gm25541</i>       | predicted gene, 25541                                              | -45    | -19  |
| 9  | <i>4933403O08Rik</i> | RIKEN cDNA 4933403O08 gene aka. testis expressed gene 16 (Tex16)   | -40    | NS   |
| 10 | <i>1810046K07Rik</i> | POU domain, class 2, associating factor 2                          | -40    | -7.1 |
| 11 | <i>Gm5639</i>        | PWWP domain containing 4, pseudogene                               | -38    | -3.2 |
| 12 | <i>Myh2</i>          | myosin, heavy polypeptide 2, skeletal muscle, adult                | -35    | -5.0 |
| 13 | <i>Gm765</i>         | MyoD family inhibitor domain containing 2                          | -35    | -6.2 |
| 14 | <i>Gm50242</i>       | predicted gene, 50242                                              | -34    | -9.0 |
| 15 | <i>Gm6018</i>        | MAD1 mitotic arrest deficient 1-like 1 pseudogene                  | -33    | NS   |
| 16 | <i>Ackr4</i>         | atypical chemokine receptor 4                                      | -28    | -17  |
| 17 | <i>Tnfrsf17</i>      | tumor necrosis factor receptor superfamily, member 17              | -28    | -1.1 |
| 18 | <i>Gm37858</i>       | predicted gene, 37858                                              | -28    | -16  |
| 19 | <i>Igkv14-130</i>    | immunoglobulin kappa variable 14-130                               | -27    | -364 |
| 20 | <i>Ptprh</i>         | protein tyrosine phosphatase receptor type H                       | -26    | -14  |
| 21 | <i>Gpr165</i>        | G protein-coupled receptor 165                                     | -25    | NS   |
| 22 | <i>Gm47652</i>       | predicted gene, 47652                                              | -25    | -4.9 |
| 23 | <i>Gm16534</i>       | family with sequence similarity 78, member A                       | -23    | -1.4 |
| 24 | <i>0610012D04Rik</i> | RIKEN cDNA 0610012D04 gene                                         | -23    | -13  |
| 25 | <i>Gm36569</i>       | predicted gene, 36569                                              | -23    | -5.2 |
| 26 | <i>GzmK</i>          | granzyme K                                                         | -23    | -8.1 |
| 27 | <i>Gm9918</i>        | predicted gene 9918                                                | -21    | -1.8 |
| 28 | <i>Gm33677</i>       | predicted gene, 33677                                              | -19    | -1.3 |
| 29 | <i>St6gal2</i>       | beta galactoside alpha 2,6 sialyltransferase 2                     | -19    | -5.7 |
| 30 | <i>Krtap17-1</i>     | keratin associated protein 17-1                                    | -18    | -2.5 |
| 31 | <i>Olf1342</i>       | olfactory receptor family 13 subfamily P member 4                  | -17    | -136 |
| 32 | <i>Lhcgr</i>         | luteinizing hormone/choriogonadotropin receptor                    | -17    | -5.8 |
| 33 | <i>Ccdc42</i>        | coiled-coil domain containing 42                                   | -16    | -8.6 |
| 34 | <i>Zfp985</i>        | zinc finger protein 985                                            | -16    | -4.5 |
| 35 | <i>Igkv4-70</i>      | immunoglobulin kappa chain variable 4-70                           | -16    | -14  |
| 36 | <i>Gm31517</i>       | predicted gene, 31517                                              | -15    | -5.3 |
| 37 | <i>Gm9767</i>        | predicted gene 9767                                                | -14    | -1.2 |
| 38 | <i>Olf71</i>         | olfactory receptor family 13 subfamily J member 1                  | -14    | -13  |
| 39 | <i>Slc26a3</i>       | solute carrier family 26, member 3                                 | -13    | -9.7 |
| 40 | <i>Trpv3</i>         | transient receptor potential cation channel, subfamily V, member 3 | -13    | -3.6 |
| 41 | <i>Gm49727</i>       | predicted gene, 49727                                              | -13    | -8.4 |
| 42 | <i>Gm43951</i>       | RIKEN cDNA 4933427D14 gene                                         | -13    | -2.0 |
| 43 | <i>E330018M18Rik</i> | RIKEN cDNA E330018M18 gene                                         | -13    | -9.8 |
| 44 | <i>Calcb</i>         | calcitonin-related polypeptide, beta                               | -13    | -3.1 |
| 45 | <i>Rspo2</i>         | R-spondin 2                                                        | -12    | -18  |
| 46 | <i>Glp1r</i>         | glucagon-like peptide 1 receptor                                   | -12    | -13  |
| 47 | <i>Fam124b</i>       | family with sequence similarity 124, member B                      | -12    | -10  |
| 48 | <i>Amt1</i>          | amelotin                                                           | -12    | -3.9 |
| 49 | <i>4930570G19Rik</i> | RIKEN cDNA 4930570G19 gene                                         | -12    | -2.9 |
| 50 | <i>Gm11574</i>       | predicted gene 11574                                               | -12    | -4.5 |
| 51 | <i>Pla2g2e</i>       | phospholipase A2, group IIE                                        | -11    | -1.1 |
| 52 | <i>Sfrp2</i>         | secreted frizzled-related protein 2                                | -11    | -6.5 |
| 53 | <i>Pigz</i>          | phosphatidylinositol glycan anchor biosynthesis, class Z           | -11    | -6.5 |
| 54 | <i>Gm13688</i>       | predicted gene 13688                                               | -11    | -3.5 |
| 55 | <i>Abca14</i>        | ATP-binding cassette, sub-family A (ABC1), member 14               | -11    | -1.0 |
| 56 | <i>B530045E10Rik</i> | RIKEN cDNA B530045E10 gene                                         | -10    | -4.2 |
| 57 | <i>Fras1</i>         | Fraser extracellular matrix complex subunit 1                      | -10    | -3.0 |
| 58 | <i>Gm12159</i>       | predicted gene 12159                                               | -10    | -2.4 |
| 59 | <i>Gm48488</i>       | predicted gene, 48488                                              | -10    | -2.5 |
| 60 | <i>9030404E10Rik</i> | RIKEN cDNA 9030404E10 gene                                         | -10    | -12  |
| 61 | <i>Hmch1</i>         | hemicentin 1                                                       | -10    | -3.0 |
| 62 | <i>Igkv4-68</i>      | immunoglobulin kappa variable 4-68                                 | -10    | -15  |
| 63 | <i>Wnt7a</i>         | wingless-type MMTV integration site family, member 7A              | -10    | -15  |
| 64 | <i>Tmem74</i>        | transmembrane protein 74                                           | -9.9   | -5.9 |
| 65 | <i>Ighv1-66</i>      | immunoglobulin heavy variable 1-66                                 | -9.9   | -31  |
| 66 | <i>Cr2</i>           | complement receptor 2                                              | -9.5   | -5.6 |



|     |                      |                                                                                             |      |      |
|-----|----------------------|---------------------------------------------------------------------------------------------|------|------|
| 67  | <i>Slc5a11</i>       | solute carrier family 5 (sodium/glucose cotransporter), member 11                           | -9.5 | -71  |
| 68  | <i>Lrrc17</i>        | leucine rich repeat containing 17                                                           | -9.3 | -6.6 |
| 69  | <i>Slc22a14</i>      | solute carrier family 22 (organic cation transporter), member 14                            | -9.2 | -1.7 |
| 70  | <i>Dipk2b</i>        | divergent protein kinase domain 2B                                                          | -9.1 | -11  |
| 71  | <i>Fgf18</i>         | fibroblast growth factor 18                                                                 | -9.0 | -5.6 |
| 72  | <i>Ndp</i>           | Norrie disease (pseudoglioma) (human)                                                       | -8.9 | -4.6 |
| 73  | <i>Gm17334</i>       | predicted gene, 17334                                                                       | -8.9 | -5.7 |
| 74  | <i>Btnl2</i>         | butyrophilin-like 2                                                                         | -8.9 | -6.7 |
| 75  | <i>Gm10432</i>       | predicted gene 10432                                                                        | -8.9 | -3.6 |
| 76  | <i>Colq</i>          | collagen-like tail subunit (single strand or homotrimer) of asymmetric acetylcholinesterase | -8.8 | -3.2 |
| 77  | <i>Gm48662</i>       | predicted gene, 48662                                                                       | -8.8 | -7.2 |
| 78  | <i>4833412C05Rik</i> | RIKEN cDNA 4833412C05 gene                                                                  | -8.7 | -2.6 |
| 79  | <i>Gm12576</i>       | predicted gene 12576                                                                        | -8.7 | -5.3 |
| 80  | <i>Igkv6-17</i>      | immunoglobulin kappa variable 6-17                                                          | -8.5 | -8.2 |
| 81  | <i>Gm13816</i>       | predicted gene 13816                                                                        | -8.3 | -8.4 |
| 82  | <i>Tmem266</i>       | transmembrane protein 266                                                                   | -8.3 | 1.2  |
| 83  | <i>Ighv5-6</i>       | immunoglobulin heavy variable 5-6                                                           | -8.3 | -67  |
| 84  | <i>Cntn4</i>         | contactin 4                                                                                 | -8.3 | -2.0 |
| 85  | <i>Rbp7</i>          | retinol binding protein 7, cellular                                                         | -8.1 | -2.3 |
| 86  | <i>Insyn2a</i>       | inhibitory synaptic factor 2A                                                               | -8.0 | -3.4 |
| 87  | <i>Slc5a12</i>       | solute carrier family 5 (sodium/glucose cotransporter), member 12                           | -7.9 | -3.1 |
| 88  | <i>Gm9947</i>        | predicted gene 9947                                                                         | -7.9 | -3.3 |
| 89  | <i>Igkv12-89</i>     | immunoglobulin kappa chain variable 12-89                                                   | -7.8 | -7.3 |
| 90  | <i>Gm26795</i>       | predicted gene, 26795                                                                       | -7.8 | -2.0 |
| 91  | <i>Ddx4</i>          | DEAD box helicase 4                                                                         | -7.7 | -1.5 |
| 92  | <i>Dclk3</i>         | doublecortin-like kinase 3                                                                  | -7.6 | -16  |
| 93  | <i>Hpcal4</i>        | hippocalcin-like 4                                                                          | -7.6 | -3.3 |
| 94  | <i>Ndnf</i>          | neuron-derived neurotrophic factor                                                          | -7.5 | -8.3 |
| 95  | <i>Igkv17-121</i>    | immunoglobulin kappa variable 17-121                                                        | -7.5 | -10  |
| 96  | <i>Slurp1</i>        | secreted Ly6/Plaur domain containing 1                                                      | -7.4 | -3.3 |
| 97  | <i>Ano4</i>          | anoctamin 4                                                                                 | -7.4 | -1.7 |
| 98  | <i>Ighv1-7</i>       | immunoglobulin heavy variable V1-7                                                          | -7.3 | -3.5 |
| 99  | <i>Rimkb</i>         | ribosomal modification protein rimK-like family member B                                    | -7.2 | -4.8 |
| 100 | <i>Igkv4-80</i>      | immunoglobulin kappa variable 4-80                                                          | -7.2 | -10  |

Suppl. Tab. ST3A. Genes with Increased Expression in Kidneys of Infected Mice

|    | Gene ID              | Gene Name                                                                          | Kidneys |      |
|----|----------------------|------------------------------------------------------------------------------------|---------|------|
|    |                      |                                                                                    | Saline  | NTCI |
| 1  | <i>Epx</i>           | eosinophil peroxidase                                                              | 118     | 231  |
| 2  | <i>Gm26965</i>       | predicted gene, 26965                                                              | 100     | 30   |
| 3  | <i>Reg3g</i>         | regenerating islet-derived 3 gamma                                                 | 83      | 116  |
| 4  | <i>Cela3b</i>        | chymotrypsin-like elastase family, member 3B                                       | 70      | -1.0 |
| 5  | <i>Gm12503</i>       | predicted gene 12503                                                               | 64      | 32   |
| 6  | <i>Gpbar1</i>        | G protein-coupled bile acid receptor 1                                             | 60      | 266  |
| 7  | <i>Dnah6</i>         | dynein, axonemal, heavy chain 6                                                    | 58      | 47   |
| 8  | <i>Fut2</i>          | fucosyltransferase 2                                                               | 50      | 252  |
| 9  | <i>Muc4</i>          | mucin 4                                                                            | 49      | 87   |
| 10 | <i>Gm43189</i>       | predicted gene 43189                                                               | 37      | 15   |
| 11 | <i>Angptl7</i>       | angiopoietin-like 7                                                                | 37      | 11   |
| 12 | <i>Pcdh8</i>         | protocadherin 8                                                                    | 32      | 49   |
| 13 | <i>Sftpa1</i>        | surfactant associated protein A1                                                   | 32      | 21   |
| 14 | <i>Mlana</i>         | melan-A                                                                            | 32      | 9.7  |
| 15 | <i>Gm16350</i>       | predicted gene 16350                                                               | 31      | 24   |
| 16 | <i>Syt2</i>          | synaptotagmin II                                                                   | 30      | 15   |
| 17 | <i>Gm17055</i>       | predicted gene 17055                                                               | 29      | 29   |
| 18 | <i>Ppy</i>           | pancreatic polypeptide                                                             | 29      | 3.5  |
| 19 | <i>Ccdc33</i>        | coiled-coil domain containing 33                                                   | 29      | 10   |
| 20 | <i>Gm33280</i>       | predicted gene, 33280                                                              | 28      | 8.9  |
| 21 | <i>Gm45643</i>       | predicted gene 45643                                                               | 27      | 15   |
| 22 | <i>Lrit3</i>         | leucine-rich repeat, immunoglobulin-like and transmembrane domains 3               | 26      | 24   |
| 23 | <i>Sbk2</i>          | SH3-binding domain kinase family, member 2                                         | 26      | 26   |
| 24 | <i>Slc6a19os</i>     | solute carrier family 6 (neurotransmitter transporter), member 19, opposite strand | 26      | 43   |
| 25 | <i>Slamf1</i>        | signaling lymphocytic activation molecule family member 1                          | 26      | 39   |
| 26 | <i>Gm5541</i>        | TD and POZ domain containing 4 pseudogene                                          | 26      | 3.8  |
| 27 | <i>Fgf21</i>         | fibroblast growth factor 21                                                        | 25      | 5.5  |
| 28 | <i>Gm49392</i>       | predicted gene, 49392                                                              | 25      | 13   |
| 29 | <i>Slc6a16</i>       | solute carrier family 6, member 16                                                 | 24      | -1.0 |
| 30 | <i>Olr1</i>          | oxidized low density lipoprotein (lectin-like) receptor 1                          | 24      | 13   |
| 31 | <i>Gm35028</i>       | predicted gene, 35028                                                              | 23      | 15   |
| 32 | <i>Slfm4</i>         | schlafen 4                                                                         | 23      | 14   |
| 33 | <i>Gm20548</i>       | predicted gene 20548                                                               | 22      | 9.3  |
| 34 | <i>Gm40709</i>       | predicted gene, 40709                                                              | 22      | 9.2  |
| 35 | <i>Speer4f2</i>      | spermatogenesis associated glutamate (E)-rich protein 4f2                          | 21      | 19   |
| 36 | <i>Gm13363</i>       | predicted gene 13363                                                               | 21      | 14   |
| 37 | <i>Egr2</i>          | early growth response 2                                                            | 20      | 11   |
| 38 | <i>Gm44260</i>       | predicted gene, 44260                                                              | 19      | 4.3  |
| 39 | <i>Marc1</i>         | mitochondrial amidoxime reducing component 1                                       | 19      | 23   |
| 40 | <i>Crygn</i>         | crystallin, gamma N                                                                | 19      | 4.5  |
| 41 | <i>Lpo</i>           | lactoperoxidase                                                                    | 18      | 24   |
| 42 | <i>Gabrp</i>         | gamma-aminobutyric acid (GABA) A receptor, pi                                      | 17      | 15   |
| 43 | <i>Bpifc</i>         | BPI fold containing family C                                                       | 17      | 5.0  |
| 44 | <i>Fgf18</i>         | fibroblast growth factor 18                                                        | 17      | 11   |
| 45 | <i>Lncenc1</i>       | long non-coding RNA, embryonic stem cells expressed 1                              | 17      | 9.1  |
| 46 | <i>Prss27</i>        | protease, serine 27                                                                | 17      | 39   |
| 47 | <i>Muc19</i>         | mucin 19                                                                           | 16      | 6.9  |
| 48 | <i>Gm39929</i>       | predicted gene, 39929                                                              | 16      | 3.5  |
| 49 | <i>Gm2670</i>        | predicted gene 2670                                                                | 16      | 6.7  |
| 50 | <i>5830487J09Rik</i> | RIKEN cDNA 5830487J09 gene                                                         | 15      | 10.0 |
| 51 | <i>Olf1442</i>       | olfactory receptor family 5 subfamily B member 94                                  | 15      | 21   |
| 52 | <i>Krt20</i>         | keratin 20                                                                         | 14      | 30   |
| 53 | <i>Gm19684</i>       | predicted gene, 19684                                                              | 14      | 1.9  |
| 54 | <i>Gm33424</i>       | predicted gene, 33424                                                              | 14      | 55   |
| 55 | <i>4732419C18Rik</i> | RIKEN cDNA 4732419C18 gene                                                         | 14      | 30   |
| 56 | <i>Gm37621</i>       | predicted gene, 37621                                                              | 14      | 13   |
| 57 | <i>Creb3l3</i>       | cAMP responsive element binding protein 3-like 3                                   | 13      | 5.9  |
| 58 | <i>Gm14319</i>       | predicted gene 14319                                                               | 13      | 18   |
| 59 | <i>Dnah10</i>        | dynein, axonemal, heavy chain 10                                                   | 12      | 12   |
| 60 | <i>Areg</i>          | amphiregulin                                                                       | 12      | 24   |
| 61 | <i>Armc12</i>        | armadillo repeat containing 12                                                     | 12      | 29   |
| 62 | <i>Eif4ebp3</i>      | eukaryotic translation initiation factor 4E binding protein 3                      | 12      | 20   |
| 63 | <i>Gdf6</i>          | growth differentiation factor 6                                                    | 11      | 4.8  |
| 64 | <i>Gm49037</i>       | predicted gene, 49037                                                              | 11      | 11   |
| 65 | <i>Gm42793</i>       | predicted gene 42793                                                               | 11      | 41   |
| 66 | <i>Der13</i>         | Der1-like domain family, member 3                                                  | 11      | 5.5  |

|     |                      |                                                                                         |     |     |
|-----|----------------------|-----------------------------------------------------------------------------------------|-----|-----|
| 67  | <i>Nptx2</i>         | neuronal pentraxin 2                                                                    | 11  | 23  |
| 68  | <i>Atp12a</i>        | ATPase, H+/K+ transporting, nongastric, alpha polypeptide                               | 10  | 6.9 |
| 69  | <i>Kcna7</i>         | potassium voltage-gated channel, shaker-related subfamily, member 7                     | 10  | 3.3 |
| 70  | <i>Prg4</i>          | proteoglycan 4 (megakaryocyte stimulating factor, articular superficial zone protein)   | 9.8 | 4.7 |
| 71  | <i>Ctla4</i>         | cytotoxic T-lymphocyte-associated protein 4                                             | 9.8 | 16  |
| 72  | <i>Gm44164</i>       | predicted gene, 44164                                                                   | 9.4 | 5.7 |
| 73  | <i>Mmp7</i>          | matrix metalloproteinase 7                                                              | 9.2 | 4.7 |
| 74  | <i>Gm44949</i>       | predicted gene 44949                                                                    | 9.2 | 8.9 |
| 75  | <i>Slc17a8</i>       | solute carrier family 17 (sodium-dependent inorganic phosphate cotransporter), member 8 | 8.9 | 2.9 |
| 76  | <i>Lamb3</i>         | laminin, beta 3                                                                         | 8.7 | 5.9 |
| 77  | <i>Plekhs1</i>       | pleckstrin homology domain containing, family S member 1                                | 8.7 | 19  |
| 78  | <i>Trim17</i>        | tripartite motif-containing 17                                                          | 8.7 | 2.8 |
| 79  | <i>Dusp8</i>         | dual specificity phosphatase 8                                                          | 8.7 | 6.2 |
| 80  | <i>4930422C21Rik</i> | RIKEN cDNA 4930422C21 gene                                                              | 8.6 | 3.7 |
| 81  | <i>Gm10727</i>       | predicted gene 10727                                                                    | 8.6 | 2.3 |
| 82  | <i>Col27a1</i>       | collagen, type XXVII, alpha 1                                                           | 8.5 | 8.5 |
| 83  | <i>Tacc2</i>         | transforming, acidic coiled-coil containing protein 2                                   | 8.3 | 5.9 |
| 84  | <i>Fat2</i>          | FAT atypical cadherin 2                                                                 | 8.3 | 2.4 |
| 85  | <i>Lif</i>           | leukemia inhibitory factor                                                              | 8.1 | 20  |
| 86  | <i>Klk1b1</i>        | kallikrein 1-related peptidase b1                                                       | 8.0 | 4.6 |
| 87  | <i>Tsc22d1</i>       | TSC22 domain family, member 1                                                           | 7.9 | 11  |
| 88  | <i>Wnt8b</i>         | wingless-type MMTV integration site family, member 8B                                   | 7.8 | 20  |
| 89  | <i>Grem1</i>         | gremlin 1, DAN family BMP antagonist                                                    | 7.7 | 14  |
| 90  | <i>Hesx1</i>         | homeobox gene expressed in ES cells                                                     | 7.7 | 15  |
| 91  | <i>Hhpl1</i>         | hedgehog interacting protein-like 1                                                     | 7.7 | 5.3 |
| 92  | <i>Ugt1a5</i>        | UDP glucuronosyltransferase 1 family, polypeptide A5                                    | 7.6 | 1.3 |
| 93  | <i>Klk1b4</i>        | kallikrein 1-related peptidase b4                                                       | 7.5 | 15  |
| 94  | <i>Gm8947</i>        | predicted gene 8947                                                                     | 7.4 | 6.0 |
| 95  | <i>A530013C23Rik</i> | RIKEN cDNA A530013C23 gene                                                              | 7.4 | 9.5 |
| 96  | <i>Myk4</i>          | myosin light chain kinase family, member 4                                              | 7.3 | 3.6 |
| 97  | <i>Cyp2a5</i>        | cytochrome P450, family 2, subfamily a, polypeptide 5                                   | 7.2 | 9.0 |
| 98  | <i>Muc1</i>          | mucin 1, transmembrane                                                                  | 6.9 | 4.5 |
| 99  | <i>Gm44588</i>       | predicted gene 44588                                                                    | 6.9 | 2.6 |
| 100 | <i>Gm45053</i>       | predicted gene 45053                                                                    | 6.8 | 10  |

## Suppl. Tab. ST3B. Genes with Decreased Expression in Kidneys of Infected Mice

|    | Gene ID              | Gene Name                                                                                   | Kidneys |        |
|----|----------------------|---------------------------------------------------------------------------------------------|---------|--------|
|    |                      |                                                                                             | Saline  | NTCI   |
| 1  | <i>Cyp11b1</i>       | cytochrome P450, family 11, subfamily b, polypeptide 1                                      | -70,748 | -1,178 |
| 2  | <i>Cyp11a1</i>       | cytochrome P450, family 11, subfamily a, polypeptide 1                                      | -27,744 | -483   |
| 3  | <i>Akr1cl</i>        | aldo-keto reductase family 1, member C-like                                                 | -17,566 | -884   |
| 4  | <i>Hsd3b1</i>        | hydroxy-delta-5-steroid dehydrogenase, 3 beta- and steroid delta-isomerase 1                | -11,966 | -476   |
| 5  | <i>Scg2</i>          | secretogranin II                                                                            | -4,862  | -674   |
| 6  | <i>Th</i>            | tyrosine hydroxylase                                                                        | -4,501  | -344   |
| 7  | <i>Cyp21a1</i>       | cytochrome P450, family 21, subfamily a, polypeptide 1                                      | -3,966  | -495   |
| 8  | <i>Chga</i>          | chromogranin A                                                                              | -3,318  | -793   |
| 9  | <i>Cyp21a2-ps</i>    | cytochrome P450, family 21, subfamily a, polypeptide 2 pseudogene                           | -1,979  | -443   |
| 10 | <i>Pnmt</i>          | phenylethanolamine-N-methyltransferase                                                      | -1,705  | -322   |
| 11 | <i>Chgb</i>          | chromogranin B                                                                              | -1,447  | -508   |
| 12 | <i>Cyp11b2</i>       | cytochrome P450, family 11, subfamily b, polypeptide 2                                      | -1,274  | -114   |
| 13 | <i>Caln1</i>         | calneuron 1                                                                                 | -1,121  | NS     |
| 14 | <i>Kcnk9</i>         | potassium channel, subfamily K, member 9                                                    | -1,062  | -238   |
| 15 | <i>Dbh</i>           | dopamine beta hydroxylase                                                                   | -912    | -641   |
| 16 | <i>Gm28382</i>       | predicted gene 28382                                                                        | -869    | -348   |
| 17 | <i>Pla2g2f</i>       | phospholipase A2, group IIF                                                                 | -851    | NS     |
| 18 | <i>Nr5a1</i>         | nuclear receptor subfamily 5, group A, member 1                                             | -843    | -988   |
| 19 | <i>Pcsk1n</i>        | proprotein convertase subtilisin/kexin type 1 inhibitor                                     | -707    | -97    |
| 20 | <i>Mgarp</i>         | mitochondria localized glutamic acid rich protein                                           | -666    | -244   |
| 21 | <i>4930486L24Rik</i> | RIKEN cDNA 4930486L24 gene                                                                  | -630    | -23    |
| 22 | <i>Cryba4</i>        | crystallin, beta A4                                                                         | -549    | -43    |
| 23 | <i>Atp2b3</i>        | ATPase, Ca <sup>++</sup> transporting, plasma membrane 3                                    | -541    | NS     |
| 24 | <i>Resp18</i>        | regulated endocrine-specific protein 18                                                     | -510    | -332   |
| 25 | <i>E330017L17Rik</i> | RIKEN cDNA E330017L17 gene                                                                  | -473    | -154   |
| 26 | <i>Pcsk1</i>         | proprotein convertase subtilisin/kexin type 1                                               | -468    | -57    |
| 27 | <i>Snap25</i>        | synaptosomal-associated protein 25                                                          | -448    | NS     |
| 28 | <i>Rims4</i>         | regulating synaptic membrane exocytosis 4                                                   | -352    | -271   |
| 29 | <i>Slc24a2</i>       | solute carrier family 24 (sodium/potassium/calcium exchanger), member 2                     | -344    | NS     |
| 30 | <i>Phox2b</i>        | paired-like homeobox 2b                                                                     | -316    | NS     |
| 31 | <i>Slc18a2</i>       | solute carrier family 18 (vesicular monoamine), member 2                                    | -286    | -31    |
| 32 | <i>Eef1a2</i>        | eukaryotic translation elongation factor 1 alpha 2                                          | -271    | -181   |
| 33 | <i>Chrna3</i>        | cholinergic receptor, nicotinic, alpha polypeptide 3                                        | -260    | -169   |
| 34 | <i>Hand2os1</i>      | Hand2, opposite strand 1                                                                    | -240    | NS     |
| 35 | <i>Cntnap5a</i>      | contactin associated protein-like 5A                                                        | -240    | -38    |
| 36 | <i>Rasgrf1</i>       | RAS protein-specific guanine nucleotide-releasing factor 1                                  | -236    | -26    |
| 37 | <i>Hand2</i>         | heart and neural crest derivatives expressed 2                                              | -226    | -951   |
| 38 | <i>Pnma1</i>         | PNMA family member 8A                                                                       | -221    | -144   |
| 39 | <i>Necab2</i>        | N-terminal EF-hand calcium binding protein 2                                                | -184    | -44    |
| 40 | <i>Tbx20</i>         | T-box 20                                                                                    | -182    | NS     |
| 41 | <i>Stmn3</i>         | stathmin-like 3                                                                             | -163    | -22    |
| 42 | <i>Gm17322</i>       | predicted gene, 17322                                                                       | -154    | -17    |
| 43 | <i>St8sia3</i>       | ST8 alpha-N-acetyl-neuraminide alpha-2,8-sialyltransferase 3                                | -148    | NS     |
| 44 | <i>Rab33a</i>        | RAB33A, member RAS oncogene family                                                          | -145    | -97    |
| 45 | <i>Synpr</i>         | synaptoporin                                                                                | -140    | -11    |
| 46 | <i>Rit2</i>          | Ras-like without CAAX 2                                                                     | -110    | -11    |
| 47 | <i>Camkv</i>         | CaM kinase-like vesicle-associated                                                          | -107    | NS     |
| 48 | <i>Gdap1</i>         | ganglioside-induced differentiation-associated-protein 1                                    | -105    | NS     |
| 49 | <i>Soga3</i>         | SOGA family member 3                                                                        | -99     | NS     |
| 50 | <i>Mdga2</i>         | MAM domain containing glycosylphosphatidylinositol anchor 2                                 | -99     | -10    |
| 51 | <i>Mab21l2</i>       | mab-21-like 2                                                                               | -96     | -122   |
| 52 | <i>Nrsn1</i>         | neurensin 1                                                                                 | -93     | -61    |
| 53 | <i>Cadps</i>         | Ca <sup>2+</sup> -dependent secretion activator                                             | -91     | -37    |
| 54 | <i>Gnb3</i>          | guanine nucleotide binding protein (G protein), beta 3                                      | -83     | NS     |
| 55 | <i>1520401A03Rik</i> | glycine rich extracellular protein 1                                                        | -82     | NS     |
| 56 | <i>Nrg3</i>          | neuregulin 3                                                                                | -82     | NS     |
| 57 | <i>Spock1</i>        | sparc/osteonectin, cwcv and kazal-like domains proteoglycan 1                               | -81     | -8.7   |
| 58 | <i>Cdk5r2</i>        | cyclin dependent kinase 5, regulatory subunit 2 (p39)                                       | -78     | NS     |
| 59 | <i>Ina</i>           | internexin neuronal intermediate filament protein, alpha                                    | -76     | -26    |
| 60 | <i>Actl6b</i>        | actin-like 6B                                                                               | -75     | NS     |
| 61 | <i>Npy2r</i>         | neuropeptide Y receptor Y2                                                                  | -74     | -21    |
| 62 | <i>Gal</i>           | galanin and GMAP prepropeptide                                                              | -70     | -49    |
| 63 | <i>Nrsn2</i>         | neurensin 2                                                                                 | -69     | NS     |
| 64 | <i>Gabrg2</i>        | gamma-aminobutyric acid (GABA) A receptor, subunit gamma 2                                  | -69     | NS     |
| 65 | <i>Gpr158</i>        | G protein-coupled receptor 158                                                              | -68     | NS     |
| 66 | <i>Slc7a14</i>       | solute carrier family 7 (cationic amino acid transporter, y <sup>+</sup> system), member 14 | -68     | -32    |

|     |                      |                                                                              |     |       |
|-----|----------------------|------------------------------------------------------------------------------|-----|-------|
| 67  | <i>Sphkap</i>        | SPHK1 interactor, AKAP domain containing                                     | -67 | -51   |
| 68  | <i>Tmem255a</i>      | transmembrane protein 255A                                                   | -67 | -61   |
| 69  | <i>8430419K02Rik</i> | RIKEN cDNA 8430419K02 gene                                                   | -66 | -2.9  |
| 70  | <i>Scg3</i>          | secretogranin III                                                            | -65 | -27.6 |
| 71  | <i>Gria1</i>         | glutamate receptor, ionotropic, AMPA1 (alpha 1)                              | -65 | -11   |
| 72  | <i>Txndc2</i>        | thioredoxin domain containing 2 (spermatozoa)                                | -63 | -59   |
| 73  | <i>Gm27477</i>       | predicted gene, 27477                                                        | -63 | -2.9  |
| 74  | <i>Gria2</i>         | glutamate receptor, ionotropic, AMPA2 (alpha 2)                              | -62 | -154  |
| 75  | <i>Gjd2</i>          | gap junction protein, delta 2                                                | -62 | NS    |
| 76  | <i>Lrrtm2</i>        | leucine rich repeat transmembrane neuronal 2                                 | -62 | -2.0  |
| 77  | <i>Hsd3b6</i>        | hydroxy-delta-5-steroid dehydrogenase, 3 beta- and steroid delta-isomerase 6 | -62 | -52   |
| 78  | <i>Diras1</i>        | DIRAS family, GTP-binding RAS-like 1                                         | -62 | -40   |
| 79  | <i>Omg</i>           | oligodendrocyte myelin glycoprotein                                          | -61 | NS    |
| 80  | <i>Gm49391</i>       | predicted gene, 49391                                                        | -60 | -6.3  |
| 81  | <i>Fam155a</i>       | NALCN channel auxiliary factor 1                                             | -59 | -14.6 |
| 82  | <i>Gm2007</i>        | predicted gene 2007                                                          | -59 | -4.6  |
| 83  | <i>Kcnq2</i>         | potassium voltage-gated channel, subfamily Q, member 2                       | -58 | -38   |
| 84  | <i>Gm42372</i>       | PNMA family member 8C                                                        | -57 | -5.8  |
| 85  | <i>Isl1</i>          | ISL1 transcription factor, LIM/homeodomain                                   | -57 | -7.2  |
| 86  | <i>Lingo3</i>        | leucine rich repeat and Ig domain containing 3                               | -57 | -20   |
| 87  | <i>Prl8a2</i>        | prolactin family 8, subfamily a, member 2                                    | -57 | NS    |
| 88  | <i>Adh7</i>          | alcohol dehydrogenase 7 (class IV), mu or sigma polypeptide                  | -56 | -20   |
| 89  | <i>Lgi1</i>          | leucine-rich repeat LGI family, member 1                                     | -53 | -7.1  |
| 90  | <i>Gm47815</i>       | predicted gene, 47815                                                        | -53 | NS    |
| 91  | <i>Gm14592</i>       | splicing factor 3a, subunit 3 pseudogene                                     | -52 | NS    |
| 92  | <i>Cdx4</i>          | caudal type homeobox 4                                                       | -52 | -21   |
| 93  | <i>Marcks11-ps4</i>  | MARCKS-like 1, pseudogene 4                                                  | -52 | -3.1  |
| 94  | <i>Sstr3</i>         | somatostatin receptor 3                                                      | -48 | -3.1  |
| 95  | <i>Pcdh10</i>        | protocadherin 10                                                             | -47 | -8.6  |
| 96  | <i>Gm27000</i>       | predicted gene, 27000                                                        | -47 | NS    |
| 97  | <i>Tub</i>           | tubby bipartite transcription factor                                         | -47 | -20   |
| 98  | <i>Mc2r</i>          | melanocortin 2 receptor                                                      | -46 | -53   |
| 99  | <i>Il20ra</i>        | interleukin 20 receptor, alpha                                               | -44 | -7.0  |
| 100 | <i>Grin2a</i>        | glutamate receptor, ionotropic, NMDA2A (epsilon 1)                           | -43 | -28   |
